# Supplementary material
Source: publisher figshare collection journal article supplement (https://acs.figshare.com/ndownloader/files/5805870)
Supplement: Supplementary file 1 [file 5805870]

#### Terms & Conditions

Electronic Supporting Information files are available without a subscription to ACS Web Editions. The American Chemical Society holds a copyright ownership interest in any copyrightable Supporting Information. Files available from the ACS website may be downloaded for personal use only. Users are not otherwise permitted to reproduce, republish, redistribute, or sell any Supporting Information from the ACS website, either in whole or in part, in either machine-readable form or any other form without permission from the American Chemical Society. For permission to reproduce, republish and redistribute this material, requesters must process their own requests via the RightsLink permission system. Information about how to use the RightsLink permission system can be found at <http://pubs.acs.org/page/copyright/permissions.html>

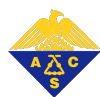

**ACS Publications**

MOST TRUSTED. MOST CITED. MOST READ.

Copyright © 1998 American Chemical Society

## Supporting Material

### One-Pot, Catalytic, Asymmetric Syntheses of All Four Stereoisomers of a Dipropionate Synthon

**General Methods.** Quinidine was purchased from Acros Organics and used without purification. Trimethylsilylquinine was prepared from commercial quinine as previously reported.<sup>1</sup> Zinc powder was purchased from Fisher Scientific and activated by successive washes with concentrated HCl, deionized water, methanol and ether. 2-Bromopropionyl bromide was purchased from Aldrich Chemical Company and distilled under reduced pressure and stored in a sealed flask protected from light. Potassium triethylborohydride, zinc triflate, and sodium borohydride were purchased from Aldrich Chemical Company and used without purification. *N,O*-dimethylhydroxylamine was prepared from the hydrochloride salt by the literature procedure.<sup>2</sup> Tetrahydrofuran (THF) was purified by passage through activated alumina under N<sub>2</sub>.<sup>3</sup> Flash chromatography was performed using E. Merck silica gel 60 (230-400 mesh).

**General Procedure for Preparation of Optically Enriched Methyl Ketene Dimer.** Zn powder (0.800 g, 12.5 mmol) was suspended in 3.5 mL of THF in a 50 mL distillation flask attached to a short path distillation apparatus and the pressure in the system was adjusted to 110 torr, whereupon the solvent began to mildly reflux. A solution of 2-bromopropionyl bromide (1.08 g, 5.00 mmol) in 3.5 mL of THF was added *via* a Teflon cannula over 5 to 8 min. Methylketene was collected as a THF solution in a 50 mL receiver flask cooled to 77K. After the addition of 2-bromopropionyl bromide was completed, the receiver flask was removed from the distillation apparatus, placed under N<sub>2</sub>, and warmed to -78 °C to afford a lime green solution. This solution was added over 2 min *via* an insulated Teflon cannula to a solution of the catalyst (0.015 mmol) in 2.5 mL of THF. This solution was maintained 1.5 h at -78 °C to give a clear, colorless solution of the methyl ketene dimer of suitable purity for subsequent transformations.

**General Procedure for the Preparation of Optically Enriched 1[3-Hydroxy-2-methylpentanoyl]azacyclopentane (1).** To a solution of the methyl ketene dimer at -78 °C, prepared as above, was added 0.109 mL of pyrrolidine (0.0932 g, 1.31 mmol) over 30 s. The appropriate reducing agent was then added immediately to this reaction mixture:

<sup>1</sup> Calter, M. A. "Catalytic, Asymmetric Dimerization of Methylketene" *J. Org. Chem.* **1996**, *61*, 8006-8007.

<sup>2</sup> Beak, P.; Basha, A.; Kokko, B.; Loo, D. *J. Am. Chem. Soc.* **1986**, *108*, 6016-6023.

<sup>3</sup> Pangborn, A. B.; Giardello, M. A.; Grubbs, R. H.; Rosen, R. K.; Timmers, F. S. *Organometallics* **1996**, *15*, 1518-1520.

**Anti Reduction.** Addition of 3.28 mL (3.28 mmol) of a 1.0 M solution of potassium triethylborohydride in ether to the  $\beta$ -ketoamide solution from above afforded a homogeneous reaction mixture, which was maintained at  $-78\text{ }^{\circ}\text{C}$  for 0.5 h, and then quenched by the addition of 14 mL of a 1:1 MeOH:pH 7 buffer mixture. The mixture was warmed to  $0\text{ }^{\circ}\text{C}$  and 14 mL of a 1:1 MeOH:30% aqueous  $\text{H}_2\text{O}_2$  mixture was added, and the heterogeneous mixture was stirred 0.5 h at  $24\text{ }^{\circ}\text{C}$ . This mixture was then extracted with  $\text{CH}_2\text{Cl}_2$  (45 mL), the resulting aqueous layer was extracted with  $\text{CH}_2\text{Cl}_2$  ( $3 \times 10\text{ mL}$ ), and the combined organic extracts were dried over  $\text{Na}_2\text{SO}_4$ , filtered and concentrated *in vacuo*. To the resulting oil was added one drop AcOH and 6 mL MeOH, and the mixture was residue was concentrated *in vacuo*. The addition and evaporation of MeOH and AcOH was repeated three times to yield a colorless oil.  $^1\text{H}$  NMR analysis of the unpurified reaction mixture indicated that the *anti* **1**:*syn***1** ratio was  $>95:5$ . Flash chromatography on silica gel ( $1 \times 15\text{ cm}$ , step gradient from 50% to 80% EtOAc in hexanes, 5% steps) yielded 0.2222 g (48%) of *anti* **1** as a clear, colorless oil, the properties of which, except for optical rotation, exactly matched those reported previously for racemic *anti* **1**.<sup>4</sup> The rotation for (2*S*,3*S*) **1** was  $[\alpha]_{\text{D}}^{25} 34^{\circ}$  ( $c\text{ } 1.02$ ,  $\text{CHCl}_3$ ). The rotation for (2*R*,3*R*) **1** was  $[\alpha]_{\text{D}}^{25} -35.9^{\circ}$  ( $c\text{ } 1.035$ ,  $\text{CHCl}_3$ ).

**Optical Purity Assay for *anti* **1**.** *Anti* **1** was converted into the corresponding hydroxy silylether by *tert*-butyldimethylsilylation of the secondary hydroxyl<sup>5</sup> followed by reduction of the amide to the primary alcohol.<sup>6</sup> The enantiomers of the hydroxy silylether were separated by GC chromatography on a Chirasil-DEX CB column ( $25\text{ m} \times 0.25\text{ mm}$ ,  $\text{df} = 0.25\text{ }\mu\text{m}$ ) at  $110\text{ }^{\circ}\text{C}$  with an average carrier gas velocity of 25 cm/s, retention time for the (2*R*,3*R*) hydroxy silylether = 31.42 min, retention time for the (2*S*,3*S*) hydroxy silylether = 31.75 min.

**Syn Reduction.** Addition of 0.5453 g (1.5 mmol) of  $\text{Zn}(\text{OTf})_2$  in 2.5 mL THF to the  $\beta$ -ketoamide solution from above afforded a homogeneous reaction mixture, which was maintained at  $-78\text{ }^{\circ}\text{C}$  for 0.5 h. To this mixture was added 0.142 g (3.75 mmol) of sodium borohydride and the reaction mixture was maintained at  $-78\text{ }^{\circ}\text{C}$  for 2h. The mixture was then raised to  $0\text{ }^{\circ}\text{C}$ , stirred for 15 min, and then quenched by the addition of 16 mL of a 1M aqueous HCl solution. The heterogeneous mixture was warmed to  $23\text{ }^{\circ}\text{C}$ , stirred for 10 min at this temperature, and then extracted with 50 mL of  $\text{CH}_2\text{Cl}_2$ . The aqueous layer was extracted with  $\text{CH}_2\text{Cl}_2$  ( $3 \times 10\text{ mL}$ ), and the combined organic extracts were dried over  $\text{Na}_2\text{SO}_4$ , filtered and concentrated *in vacuo*.  $^1\text{H}$  NMR analysis of the unpurified reaction mixture indicated that the *syn***1**:*anti* **1** ratio was  $>95:5$ . Flash chromatography on silica gel ( $1 \times 15\text{ cm}$ , step gradient from 40% to 50% EtOAc in hexanes, 2.5% steps) yielded 0.2050 g (47%) of *syn* **1** as a clear, colorless oil, the properties of which,

<sup>4</sup> Ireland, R. E.; Brown, F. R. *J. Org. Chem.* **1980**, *45*, 1868-1880.

<sup>5</sup> Corey, E. J.; Venkateswarlu, A. *J. Am. Chem. Soc.* **1972**, *94*, 6190-6191.

<sup>6</sup> Brown, H. C.; Kim, S. C.; Krishnamurthy, S. *J. Org. Chem.* **1980**, *45*, 1-12

except for optical rotation, exactly matched those reported previously for racemic *syn* **1**.<sup>4</sup> The rotation for (2*S*,3*R*) **1** was  $[\alpha]_D$  15.1° (*c* 1.01, CHCl<sub>3</sub>). The rotation for (2*R*,3*S*) **1** was  $[\alpha]_D$  -14.7° (*c* 1.015, CHCl<sub>3</sub>).

**Optical Purity Assay for *syn* 1.** *Syn* **1** was converted into the corresponding hydroxy silylether by *tert*-butyldimethylsilylation of the secondary hydroxyl<sup>5</sup> followed by reduction of the amide to the primary alcohol.<sup>6</sup> The enantiomers of the hydroxy silylether were separated by GC chromatography on a Chirasil-DEX CB column (25 m × 0.25 mm, df = 0.25 μm) at 150 °C with an average carrier gas velocity of 25 cm/s, retention time for the (2*S*,3*R*) hydroxy silylether = 30.97 min, retention time for the (2*R*,3*S*) hydroxy silylether = 33.99 min.

**General Procedure for the Preparation of Optically Enriched 3-Hydroxy-2-methyl-N-methyl-N-methoxypentanamide (2).** To a solution of the methyl ketene dimer at -78 °C, prepared as above, was added 0.100 mL of *N,O*-dimethylhydroxylamine (0.0839 g, 1.375 mmol) and 0.0065 g (0.069 mmol) of pyridone. The reaction mixture was warmed to 0 °C, maintained at this temperature for 4 h, and then recooled to -78 °C and the appropriate reduction agent was then added. The reduction conditions and reagents for the reduction were identical to those used to produce **1**. The analytical data for both enantiomers of *Syn* **2** matched those previously reported for these compounds.<sup>7</sup> The data for *Anti*-**2** follow; for (2*R*,3*R*) **2**,  $[\alpha]_D$  -38.9° (*c* 1.025, CHCl<sub>3</sub>), for (2*S*,3*S*) **2**,  $[\alpha]_D$  37.2° (*c* 1.04, CHCl<sub>3</sub>); IR (thin film)  $\nu$  3445, 2970, 2940, 2880, 1640, 1460, 1390, 1180, 1120, 990; <sup>1</sup>H NMR (CDCl<sub>3</sub>, 360 MHz)  $\delta$  3.70 (s, 3 H, NOCH<sub>3</sub>), 3.51-3.55 (m, 1 H, C<sub>3</sub>H), 3.29 (d, 1 H, *J* = 7.6 Hz, OH), 3.18 (s, 3 H, NOCH<sub>3</sub>), 2.90-2.97 (m, 1 H, C<sub>2</sub>H), 1.42-1.55 (m, 2 H, CH<sub>2</sub>), 1.21 (d, 1 H, *J* = 7.1, C(H)CH<sub>3</sub>), 0.97 (t, 3 H, *J* = 7.4 Hz, CH<sub>2</sub>CH<sub>3</sub>); <sup>13</sup>C NMR (CDCl<sub>3</sub>, 90.56 MHz)  $\delta$  177.4, 75.4, 61.5, 39.6, 31.8, 28.2, 15.0, 10.2; Anal. Calcd for C<sub>8</sub>H<sub>17</sub>N<sub>1</sub>O<sub>3</sub>: C, 54.84; H, 9.78; N, 7.99. Found: C, 54.79; H, 9.81; N, 7.88.

**Optical Purity Assay for *anti* 2.** The enantiomers of *anti* **2** were separated by GC chromatography on a Chirasil-DEX CB column (25 m × 0.25 mm, df = 0.25 μm) with an average carrier gas velocity of 25 cm/s. The column was maintained at 100 °C for 25 min, and then temperature was raised at 1 °C/min for 20 min. The retention time for (2*R*,3*R*) **2** = 33.66 min, and the retention time for (2*S*,3*S*) **2** = 34.74 min. The diastereomers of **2** were also resolved under the same conditions.

**Optical Purity Assay for *syn* 2.** The enantiomers of *syn* **2** were separated by GC chromatography on a Chirasil-DEX CB column (25 m × 0.25 mm, df = 0.25 μm) with an average carrier gas velocity of 25 cm/s. The column was maintained at 100 °C for 25 min, and then temperature was raised at 1 °C/min for 20 min. The retention time for (2*R*,3*S*) **2** = 32.96 min, and

<sup>7</sup> Cane, D. E.; Tan, W.; Ott, W. R. *J. Am. Chem. Soc.* **1993**, *115*, 527-535.

page 4

the retention time for (2*S*,3*R*) **2** = 33.20 min. The diastereomers of **2** were also resolved under the same conditions.
